# Supplementary material
Source: publisher site journal article supplement (https://www.spandidos-publications.com/5062/downloadSupplementary)
Supplement: Supplementary file 1 [file downloadSupplementary]

## Sheet: Table S2.xls
Table SIII. Differentially expressed long non-coding RNAs in The Cancer Genome Atlas pancreatic adenocarcinoma data set.
Gene	conMean	treatMean	logFC	P-value	FDR
LINC01133	2.56281	22.5445	3.13698	1.34e-05	0.000345387
AC091043.1	0.0829115	0.465232	2.48831	5.96e-05	0.0011919
MIR31HG	0.262327	1.66407	2.66527	0.000530709	0.00792699
AC026471.3	0.361055	0.807026	1.1604	1.18e-07	6.59e-06
AP001107.9	0.924903	2.40738	1.38009	0.000114329	0.00209044
AC079949.1	0.218422	0.50853	1.21922	0.000504044	0.00769081
U47924.1	0.159339	0.422101	1.40549	0.000667081	0.00937006
AC025575.2	0.132823	0.722032	2.44255	4.75e-05	0.00097789
TONSL-AS1	0.54219	1.55293	1.51812	4.69e-09	4.33e-07
LINC01251	0.0483693	0.294708	2.60712	0.00146573	0.0176638
AC011676.1	0.284301	0.586073	1.04366	0.000781362	0.0103579
LINC00857	0.698594	2.37854	1.76755	0.00130737	0.0159363
LINC01876	0.172058	0.518825	1.59235	4.31e-05	0.000905986
AC104985.1	0.0564098	0.27002	2.25905	0.00356294	0.0337366
AL022322.1	0.599878	1.65708	1.4659	1.08e-06	4.22e-05
AC093904.4	0.0127154	0.235428	4.21064	5.37e-07	2.42e-05
LINC02041	0.592459	4.68206	2.98236	0.000711631	0.00973716
AL117382.1	0.150056	0.698732	2.21924	9.35e-05	0.00175417
SSTR5-AS1	0.337615	1.35757	2.00757	0.000459638	0.00711601
SMIM2-AS1	0.218964	0.650296	1.57041	0.00123663	0.0151612
AC020907.1	0.0279516	0.61669	4.46354	4.23e-19	2.99e-16
AC233992.3	0.15945	0.324305	1.02425	0.000222118	0.00383019
AC099518.2	0.161577	0.594734	1.88002	0.00197908	0.0217949
AC008808.2	0.246756	1.01389	2.03874	0.00122616	0.0151202
AC004080.2	0.00909277	0.346854	5.25347	6.02e-08	3.65e-06
AP000696.1	0.0135922	0.256433	4.23773	6.77e-15	2.39e-12
PCAT7	0.248137	0.865255	1.80199	2.6e-05	0.000600463
AL354707.1	0.489304	1.06023	1.11558	2.5e-05	0.000582815
AC104031.1	0.161812	0.587598	1.86051	0.000241732	0.0041017
LINC01833	0.011546	0.46106	5.31949	2.21e-08	1.61e-06
AL118505.1	0.259107	0.907604	1.80851	0.00249129	0.0258307
AC092919.1	0.0220768	0.230152	3.38199	0.00160208	0.0186704
CASC8	0.132549	1.23143	3.21574	6.1e-09	5.1e-07
AL356740.3	0.105082	0.464093	2.1429	7.75e-06	0.000213396
AL365181.3	1.03951	3.91464	1.91298	2.36e-06	7.69e-05
LINC01124	0.121875	0.517759	2.08688	5.68e-06	0.000165132
AC068134.2	0.0142918	0.233982	4.03314	7.2e-09	5.66e-07
AL031123.2	0.158808	0.337056	1.0857	0.00268445	0.0273883
TMEM105	0.111407	0.685586	2.6215	3.31e-05	0.000736248
C6orf99	0.192615	0.697767	1.85702	1.89e-07	1e-05
AC005062.1	0.0662946	0.292344	2.1407	6.82e-06	0.000190422
LINC02188	0.362688	2.13675	2.55862	0.00136392	0.0165308
AC090912.3	0.0363817	0.249543	2.778	0.000224847	0.00384598
AP003032.1	0.0775011	0.215401	1.47473	0.00339936	0.0324776
AC026368.1	0.538715	1.10932	1.04208	0.000715534	0.00973716
SYNPR-AS1	0.145223	1.15239	2.98828	3.93e-05	0.000847848
AL162411.1	0.0621275	0.205289	1.72435	0.00559223	0.0492163
AC005696.4	0.188556	0.949275	2.33183	1.67e-05	0.000416849
LINCR-0001	0.516614	1.46946	1.50812	0.00441134	0.0403295
RMST	0.086516	0.41071	2.24708	0.0046501	0.0421489
LINC00479	0.0622543	0.301009	2.27356	2.52e-06	7.98e-05
SLCO4A1-AS1	0.690832	4.25003	2.62107	3.83e-07	1.8e-05
AC093904.3	0.013738	0.282587	4.36245	6.61e-08	3.89e-06
IGFL2-AS1	0.189776	1.7387	3.19564	6.09e-05	0.00120119
ATP2C2-AS1	0.113325	0.283922	1.32503	0.0041093	0.0378949
HOTTIP	0.012584	0.429161	5.09186	1.46e-09	1.48e-07
AC024941.2	0.144376	0.468932	1.69955	2.54e-08	1.69e-06
KCNMB2-AS1	0.0235122	0.261145	3.47337	6.66e-07	2.88e-05
AGAP1-IT1	0.14829	0.538022	1.85924	0.000865045	0.0113257
LINC02565	0.0933752	0.4763	2.35076	0.000453882	0.00707856
SH3PXD2A-AS1	0.394984	2.30601	2.54554	0.00321436	0.0311309
LINC00323	0.119547	0.312854	1.38791	2.61e-06	8.13e-05
HOXB-AS4	0.0226708	0.769404	5.08484	6.92e-18	3.67e-15
CASC9	0.0111773	1.4281	6.99738	2.28e-12	4.4e-10
ELN-AS1	1.24476	2.66906	1.10047	1.25e-05	0.000326488
AC106876.1	0.4752	2.35297	2.30788	1.88e-05	0.000458432
AC010761.6	0.0880801	0.325294	1.88486	0.00019732	0.00345881
LINC01978	0.216119	1.2921	2.57982	2.91e-07	1.43e-05
AL390719.2	3.67346	11.4679	1.64239	0.00296563	0.0298109
LINC00443	0.479046	2.94348	2.61928	0.00197942	0.0217949
AC007342.4	0.0711597	0.341733	2.26374	0.000507959	0.00769081
AC021549.1	0.0380234	0.279644	2.87863	0.00202497	0.0220692
LINC02387	0.0633385	0.222378	1.81186	0.0040704	0.0377
AL109615.3	0.142724	0.541228	1.92301	1.86e-05	0.000458432
AL035252.3	0.182725	0.397837	1.1225	0.000281673	0.00463123
AC007556.1	0.0329354	0.254155	2.948	0.000534692	0.00793064
LINC02535	0.151154	0.426188	1.49547	0.00303026	0.0298939
AP001207.3	0.0620751	0.268588	2.11331	1.12e-05	0.000297832
LINC02560	0.145562	0.588766	2.01606	0.0032978	0.0317938
BCAR3-AS1	0.453969	1.4367	1.6621	6.92e-05	0.00134585
Z97653.1	0.269975	0.62845	1.21897	0.00169402	0.0193173
AC009065.2	0.882355	6.22569	2.8188	1.56e-09	1.5e-07
AC026462.3	0.0311249	0.354799	3.51086	5.79e-06	0.000166042
AC093904.2	0	0.27095	Inf	1.27e-13	2.98e-11
AP003559.1	0.040152	0.301091	2.90666	2.03e-06	6.95e-05
LINC01091	0.0649984	0.305208	2.23131	3.6e-08	2.31e-06
AL583810.1	0.0689771	0.228774	1.72973	0.00194281	0.0216879
PTGES2-AS1	0.188284	0.45409	1.27007	0.000205739	0.00357683
AC007342.5	0.0605629	0.393755	2.70079	6.27e-15	2.39e-12
LINC01659	0.0660862	0.226608	1.77778	0.000586441	0.00851946
AC084026.2	0.0905021	0.299417	1.72613	4.8e-11	6.36e-09
MIR200CHG	3.85182	11.7334	1.60701	0.00301761	0.0298939
AL138930.1	1.85868	7.25749	1.96519	8.51e-07	3.47e-05
AL512413.1	0.306416	1.01771	1.73177	0.00183435	0.0205855
TYMSOS	0.228276	0.572101	1.32549	0.00034713	0.00557774
AC020663.2	0.176492	0.550201	1.64036	0.00468064	0.0422453
AL512328.1	0.0565168	0.375527	2.73216	4.03e-05	0.000854459
AC108751.3	0.0572302	0.331935	2.53605	4.51e-06	0.000136764
AC008870.3	0.0478556	0.269151	2.49166	0.000330528	0.00535153
AC010735.2	0.412762	1.04498	1.34009	0.00221021	0.023676
LINC01977	0.222812	0.506937	1.18598	0.00502051	0.0447416
FOXD3-AS1	0.0515655	0.335834	2.70327	0.000509018	0.00769081
AC138150.2	0.18964	0.394857	1.05806	0.00203515	0.0220692
HNF1A-AS1	0.844245	2.56592	1.60374	0.00243193	0.0256624
TRPC7-AS1	0.0466692	0.76244	4.03008	4.88e-05	0.000985496
SMILR	0.0569734	0.243048	2.09288	0.00149472	0.0179113
MYRF-AS1	0.0701466	0.224805	1.68023	0.000934047	0.01208
AL161431.1	0.0469443	1.75876	5.22747	1.3e-06	4.91e-05
AL133325.3	0.237108	1.50847	2.66947	0.00460726	0.0419399
AL035250.1	0.0495682	0.328304	2.72755	0.000597264	0.00861767
AL589765.1	0.0552001	0.377479	2.77365	0.00115934	0.0144644
SCAT1	0.191783	0.633614	1.72413	0.00119288	0.014796
AC120498.10	0.151162	0.806501	2.41558	0.00163959	0.0188998
AC010754.1	0.124958	0.336082	1.42737	0.000750733	0.0100779
AC099518.6	0.337037	0.695373	1.04488	0.00165746	0.0190025
LINC01956	0.0237098	0.317223	3.74194	2.28e-08	1.61e-06
AC092171.5	0.711277	1.65536	1.21866	0.00349898	0.0332796
UNC5B-AS1	0.615611	3.71339	2.59265	2.11e-06	6.98e-05
AC103702.2	0.296038	2.5755	3.121	5.55e-06	0.000163392
MIR4713HG	0.0381375	0.223725	2.55245	2.59e-07	1.31e-05
LINC02320	0.148385	0.679486	2.1951	0.00302588	0.0298939
AP002498.1	0.379612	2.56918	2.75871	0.00274588	0.0277334
LINC02747	0.25089	1.36225	2.44087	0.00491362	0.0439738
AC015660.1	0.105951	0.809305	2.93328	2.61e-11	3.69e-09
AC107308.1	0.0136745	0.266639	4.28533	2.39e-07	1.23e-05
KDM7A-DT	1.47148	2.97301	1.01466	1.24e-10	1.54e-08
LINC02332	0.145468	0.295397	1.02196	0.00546161	0.0484689
LINC01843	0.777637	2.38007	1.61383	0.000539831	0.00795126
LHFPL3-AS2	0.547028	1.76212	1.68762	0.000612235	0.0087151
AP000894.4	0.563832	1.54299	1.4524	0.00430757	0.0395514
PACERR	0.166555	0.452441	1.44173	2.96e-05	0.000668703
PART1	0.0158257	0.279157	4.14073	0.000837646	0.0110351
AC002401.4	0.187999	1.33466	2.82768	6.14e-10	6.51e-08
AP006621.1	0.125706	0.42863	1.76968	0.00071617	0.00973716
AC012213.4	0.0232544	0.710466	4.93319	2.52e-06	7.98e-05
MYO16-AS1	0.0228203	0.406254	4.154	1.5e-06	5.38e-05
AL024508.1	0.230542	0.758896	1.71887	1.32e-06	4.91e-05
AC022784.1	0.407857	2.06682	2.34127	0.00248927	0.0258307
MIR7-3HG	1.61528	9.27254	2.52118	0.0010758	0.0136634
AL691482.3	1.69371	6.32458	1.90079	0.000196404	0.00345881
AC009065.5	0.778524	6.58301	3.07993	1.84e-11	2.79e-09
AC130456.2	0.182273	0.954367	2.38845	0.000770639	0.01028
AL353747.2	0.0295991	0.282341	3.25382	0.00231489	0.0246728
LINC00659	0.24671	1.03235	2.06504	0.000279477	0.00463102
HOXA11-AS	0.058779	0.441421	2.90878	7.76e-07	3.23e-05
LINC01269	0.173026	1.03395	2.57911	1.09e-05	0.000292065
AC105219.1	0.0644909	0.977278	3.9216	4.64e-10	5.18e-08
LINC00887	0.0998821	0.234055	1.22855	0.00392927	0.0365525
FEZF1-AS1	0.175642	1.439	3.03436	3.65e-05	0.000798131
AL133370.1	0.224209	2.05404	3.19555	3.03e-06	9.33e-05
AC005550.2	0.129163	1.07555	3.05781	0.000299013	0.00487851
AC010478.1	0.193938	0.723436	1.89927	0.000702265	0.00973533
LINC01703	0.230943	0.476058	1.0436	0.00552693	0.0488442
AC002511.1	0.0949342	0.381037	2.00493	0.00332914	0.0319507
AL121772.1	0.0685256	0.631597	3.20429	5.17e-22	1.1e-18
LINC00365	0.0233435	0.341431	3.8705	8.16e-14	2.16e-11
AC009275.1	0.504926	1.10416	1.1288	0.00318269	0.0309655
TRIM31-AS1	0.177339	1.2657	2.83535	1.9e-08	1.44e-06
AL445524.1	1.39248	3.20204	1.20133	9.47e-07	3.79e-05
AC010998.3	0.144216	2.51454	4.12399	0.000947383	0.0121782
AC004816.1	1.06417	2.4817	1.22159	0.0030614	0.0300613
AC068580.2	0.164531	1.07031	2.7016	0.0030796	0.0301006
PP7080	3.38807	8.71081	1.36234	2.19e-05	0.000522972
AC087491.1	0.125659	0.543911	2.11386	1.18e-07	6.59e-06
AC004009.1	0.0876983	0.78553	3.16305	4.56e-07	2.1e-05
ARHGEF2-AS1	0.0480867	0.706131	3.87622	4.57e-10	5.18e-08
AL391845.2	0.116476	0.352901	1.59923	0.0015246	0.0180653
LINC02595	0.0840167	0.411299	2.29144	0.00154335	0.0180854
AC097468.1	0.0610352	0.34627	2.50418	3.96e-05	0.000847848
AC027228.2	0.150535	0.687363	2.19097	0.00114245	0.014338
LINC02313	0.160463	0.887038	2.46676	0.000877291	0.0114155
AL596223.2	0.182804	0.463148	1.34117	4.52e-05	0.000939919
LINC02004	0.0658349	0.375439	2.51166	6.91e-07	2.93e-05
AL158206.1	2.10935	5.9221	1.48931	1.53e-06	5.41e-05
AC024592.2	0.236169	0.714943	1.59801	0.000269804	0.00450594
LINP1	0.214634	1.66331	2.95411	2.19e-05	0.000522972
HOXB-AS3	0.752173	1.78645	1.24796	7.03e-05	0.00135502
AC080037.2	0.361922	1.41441	1.96645	0.00175482	0.0197978
AL365181.2	0.254772	1.97363	2.95357	6.73e-12	1.19e-09
AL606489.1	0.455256	1.64082	1.84967	6.12e-05	0.00120119
APCDD1L-DT	0.104069	0.568218	2.44891	5.25e-06	0.000156775
AC004264.1	0.373807	1.43862	1.94432	8.72e-06	0.000237099
PTPRN2-AS1	1.55494	0.603684	-1.36499	0.000410493	0.00649743
AC022306.3	0.11103	0.271884	1.29205	0.000444984	0.0069912
FAM27E3	0.1099	0.276756	1.33243	3.33e-05	0.000736248
B3GAT1-DT	0.0679634	0.52425	2.94742	1.39e-06	5.08e-05
AC092171.3	0.31279	0.814475	1.38067	0.00051127	0.00769081
AC084864.1	0.137454	0.433327	1.65651	0.000117884	0.00213702
AL021807.1	0.15147	1.01395	2.74288	2.5e-08	1.69e-06
AC025154.2	0.21414	2.02298	3.23985	6.25e-09	5.1e-07
LINC02038	0.343492	1.33839	1.96215	0.00012136	0.0021814
FAM83A-AS1	0.12411	1.33508	3.42723	1.22e-06	4.71e-05
LINC00930	0.0902593	0.356998	1.98377	0.00211904	0.0228146
AC021218.1	0.597658	2.79058	2.22317	0.00150726	0.0179601
DCST1-AS1	0.610691	1.31995	1.11197	2.84e-05	0.000647615
PICART1	0.196366	0.447986	1.18991	8.87e-12	1.45e-09
LINC01014	0.0777137	0.565569	2.86346	9.24e-05	0.00175046
AL135999.3	0.0588152	0.323485	2.45944	4.48e-08	2.8e-06
AP005233.2	1.52621	14.1112	3.20881	9.87e-05	0.0018357
PICSAR	0.117249	0.569827	2.28095	0.00154112	0.0180854
MIR194-2HG	0.263076	1.42713	2.43957	0.000607595	0.00870749
AC012213.1	0.0348263	0.306322	3.1368	1.61e-05	0.00040756
AP000688.2	0.0664504	0.376828	2.50356	5.85e-07	2.58e-05
CRNDE	0.759885	3.39799	2.16083	0.0029803	0.0298171
HOTAIR	0.0338421	0.426299	3.65497	4.84e-05	0.000985496
MAP3K20-AS1	0.0854909	1.40071	4.03424	1.23e-07	6.71e-06
AL109976.1	0.0767505	0.287897	1.9073	1.15e-14	3.49e-12
AP001783.1	0.102571	0.394932	1.94498	0.00246337	0.0258307
LINC02489	0.163634	1.08551	2.72983	0.00114023	0.014338
LINC02178	0.0118955	0.237733	4.32086	2e-06	6.95e-05
AL590666.2	1.03502	2.56509	1.30935	0.000265623	0.00447133
AC068305.2	0.130548	0.675961	2.37236	9.01e-05	0.00172106
LINC01589	0.425277	1.08449	1.35054	0.0020394	0.0220692
AC012317.1	0.00946738	0.597556	5.97996	2.16e-13	4.58e-11
AFAP1-AS1	0.209905	5.73274	4.77142	3.06e-21	3.25e-18
FC, fold change; FDR, false discovery rate.
